# Supplementary material for: Four Pb(ii) metal–organic frameworks with increasing dimensions: structural diversities by varying the ligands
Source: Royal Society of Chemistry journal article supplement (doi:10.1039/c5nj03632a), 2016-01-01
Supplement: c5nj03632a1.pdf [file c5nj03632a1.pdf]

## Supporting Information

### **Four Pb(II) Metal–Organic Frameworks with Increasing Dimensions: Structural Diversities by Varying the Ligands**

Fangna Dai,<sup>\*,a</sup> Weidong Fan,<sup>a</sup> Jiahui Bi,<sup>a</sup> Qian Zhang,<sup>a</sup> XiRui Zhang,<sup>a</sup> Tuo Liang,<sup>a</sup>  
Xingyi Wang,<sup>a</sup> Bin Dong<sup>a</sup> and Jing Gao<sup>\*,b</sup>

<sup>a</sup>State Key Laboratory of Heavy Oil Processing, College of Science, China  
University of Petroleum (East China), Qingdao, Shandong, 266580 (P.R. China).

<sup>b</sup>School of Chemical Engineering, Zhejiang University of Technology, Hangzhou  
310032, P.R. China

E-mail: fndai@upc.edu.cn; jingjg369@zjut.edu.cn.

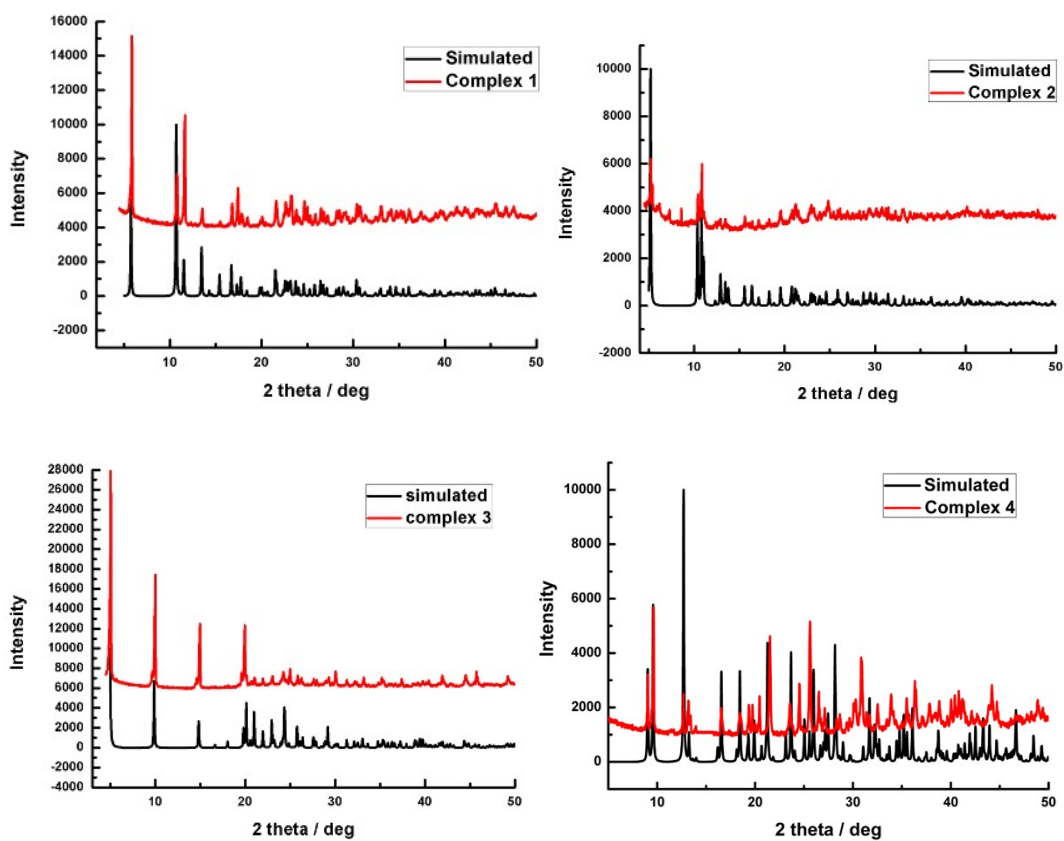

Figure S11. X-ray Powder Diffraction Analyses.

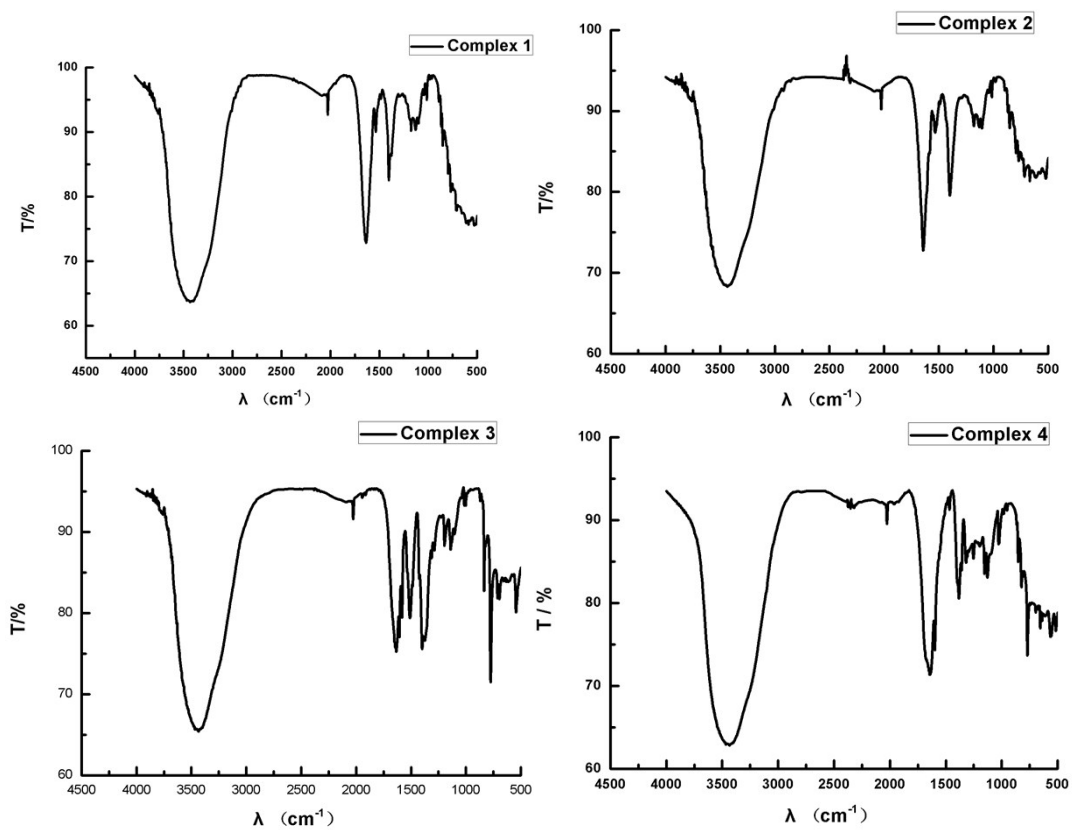

Figure S12. IR Spectra.

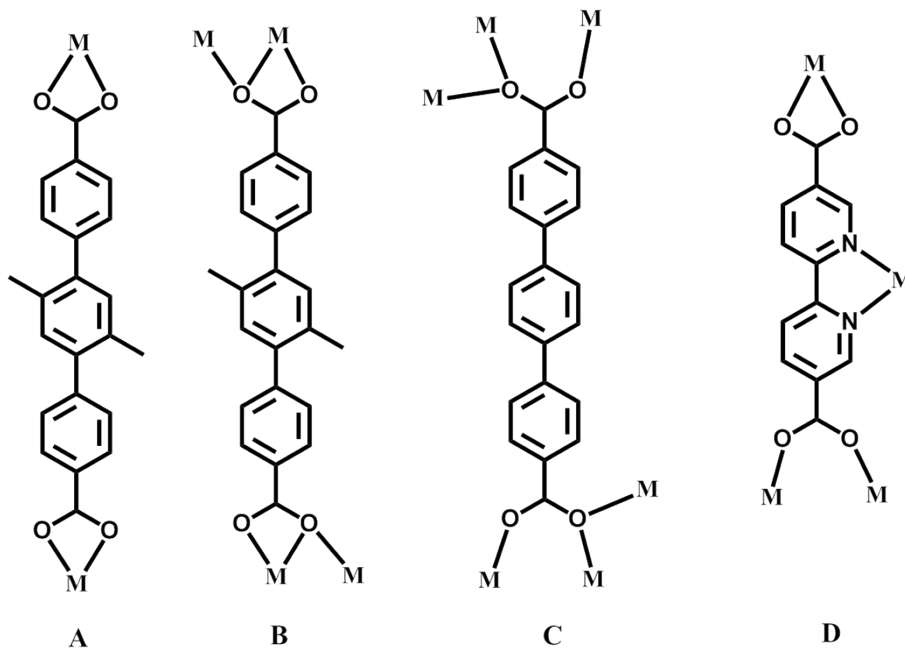

Figure S13. Coordination mode of ligands in 1-4.
